# Supplementary material for: Diagnosis, Classification and Management of Mast Cell Activation Syndromes (MCAS) in the Era of Personalized Medicine
Source: PubMed Central journal article supplement (PMC7731385; doi:10.3390/ijms21239030), 2020-11-27
Supplement: ijms-21-09030-s001.pdf [file ijms-21-09030-s001.pdf]

## Supplementary Materials

**Table S1.** Consensus criteria for mast cell activation syndrome (MCAS) \*.

|                                                                                                                                                                                                   |
|---------------------------------------------------------------------------------------------------------------------------------------------------------------------------------------------------|
| i) Typical clinical signs of severe, recurrent (episodic) systemic mast cell activation are present (often in form of anaphylaxis) (definition of systemic: involving at least two organ systems) |
| ii) Involvement of MC is documented by biochemical studies: preferred marker: increase in serum tryptase level from the individual's baseline to plus 20% plus 2 ng/mL **                         |
| iii) Response of symptoms to therapy with MC-stabilizing agents, drugs directed against MC mediator production or drugs blocking mediator release or effects of MC-derived mediators ***          |

\* The consensus criteria for MCAS were first published in (27). All three MCAS criteria (i+ii+iii) must be fulfilled to call a condition MCAS.\*\* Other MC-derived markers of MC activation (histamine and histamine metabolites, PGD2 metabolites) have also been proposed but are less specific compared to tryptase. Abbreviations: MC, mast cells; PGD2, prostaglandin D2. \*\*\* Example: histamine receptor blockers.

**Table S2.** Conditions and Disorders (Co-Morbidities) predisposing to MCA/MCAS.

| <b>Predisposing Condition</b>         | <b>Estimated Frequency of Anaphylaxis / MCAS (% of patients affected)</b> |
|---------------------------------------|---------------------------------------------------------------------------|
| <b>Isolated:</b>                      |                                                                           |
| Hereditary Alpha Trypsinemia (HAT)    | 5–10%                                                                     |
| Hymenoptera Venom Allergy (HVA)       | 10–20%                                                                    |
| Other IgE-Dependent Allergies (IgE-A) |                                                                           |
| Atopic Dermatitis (AD)                | 10%                                                                       |
| Other Atopic Disorders                |                                                                           |
| Cutaneous Mastocytosis (CM)           | <5%                                                                       |
| Systemic Mastocytosis (SM)            | <5%                                                                       |
| <b>Combined *:</b>                    |                                                                           |
| HAT + CM                              | 10%                                                                       |
| HAT + SM                              | 10%                                                                       |
| IgE-A + CM/SM                         | 5–10%                                                                     |
| HAT + SM + HVA                        | 50%                                                                       |

\* Patients suffering from the combined MCAS type are at high risk to develop life-threatening anaphylaxis despite prophylactic anti-mediator therapy. Abbreviations: MCAS, mast cell activation syndrome; IgE, immunoglobulin E; HAT, hereditary alpha tryptasemia; HVA, hymenoptera venom allergy.

**Table S3.** Variants of MCAS and diagnostic features (criteria).

| <b>Variant of MCAS</b>            | <b>Main Diagnostic Features</b>                                                                                                                                                                               |
|-----------------------------------|---------------------------------------------------------------------------------------------------------------------------------------------------------------------------------------------------------------|
| Primary MCAS<br>(= Clonal MCAS) * | the <i>KIT</i> D816V mutation is detected and mast cells<br>the <i>KIT</i> D816V mutation is detected and mast cells<br>a) with confirmed mastocytosis (CM or SM) **<br>b) with only two minor SM criteria ** |
| Secondary MCAS                    | an IgE-mediated allergy, another hypersensitivity<br>reaction or another immunologic disease that can<br>induce MCA and thus MCAS, is diagnosed, but<br>no neoplastic MC or <i>KIT</i> D816V is found ***     |
| Idiopathic MCAS                   | criteria to diagnose MCAS are met, but no related<br>reactive disease, no IgE-dependent allergy, and<br>no neoplastic/clonal MC are found                                                                     |

\* The terms clonal MCAS, monoclonal MCAS (=MMAS) can be used synonymously with the term primary MCAS. \*\* Most of the patients suffer from CM or SM. However, in some cases, only two minor SM criteria are detected and criteria for SM and CM are not fulfilled. \*\*\* No *KIT* mutation at codon 816 is detected, and flow cytometry (if performed) will not detect a clonal population of CD25-positive MC. Abbreviations: MC, mast cells; MCA, MC activation; CM, cutaneous mastocytosis; SM, systemic mastocytosis.
